# Supplementary material for: Circular RNA hsa_circ_0000277 promotes tumor progression and DDP resistance in esophageal squamous cell carcinoma
Source: PubMed Central journal article supplement (PMC8895546; doi:10.1186/s12885-022-09241-9), 2022-03-04
Supplement: 12885_2022_9241_MOESM2_ESM.pdf [file 12885_2022_9241_MOESM2_ESM.pdf]

Fig6G

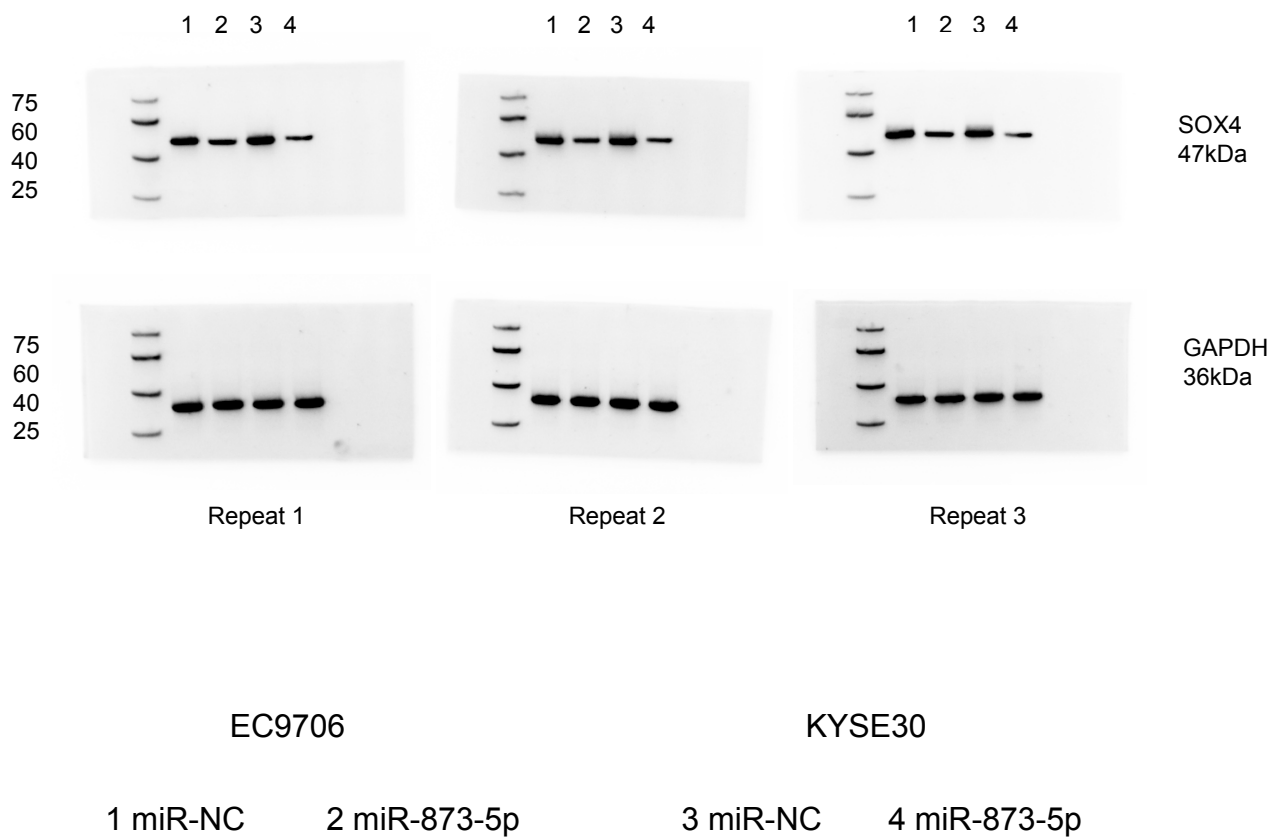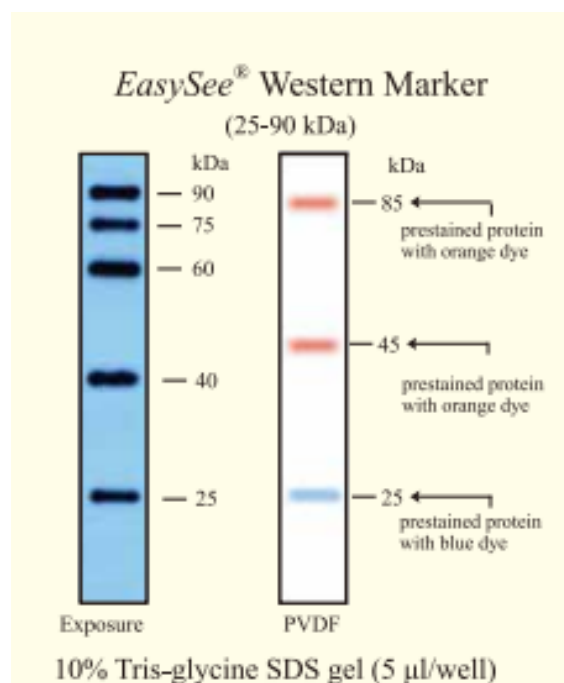

Fig7B

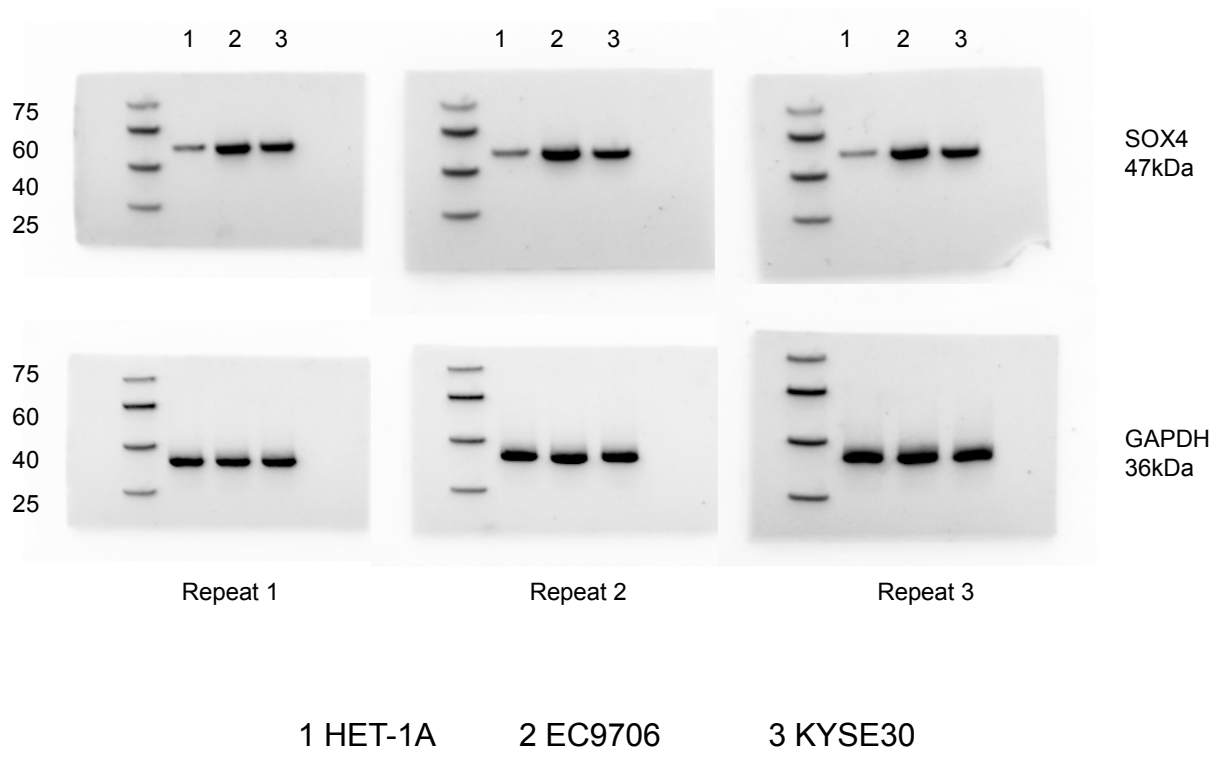

Fig7C

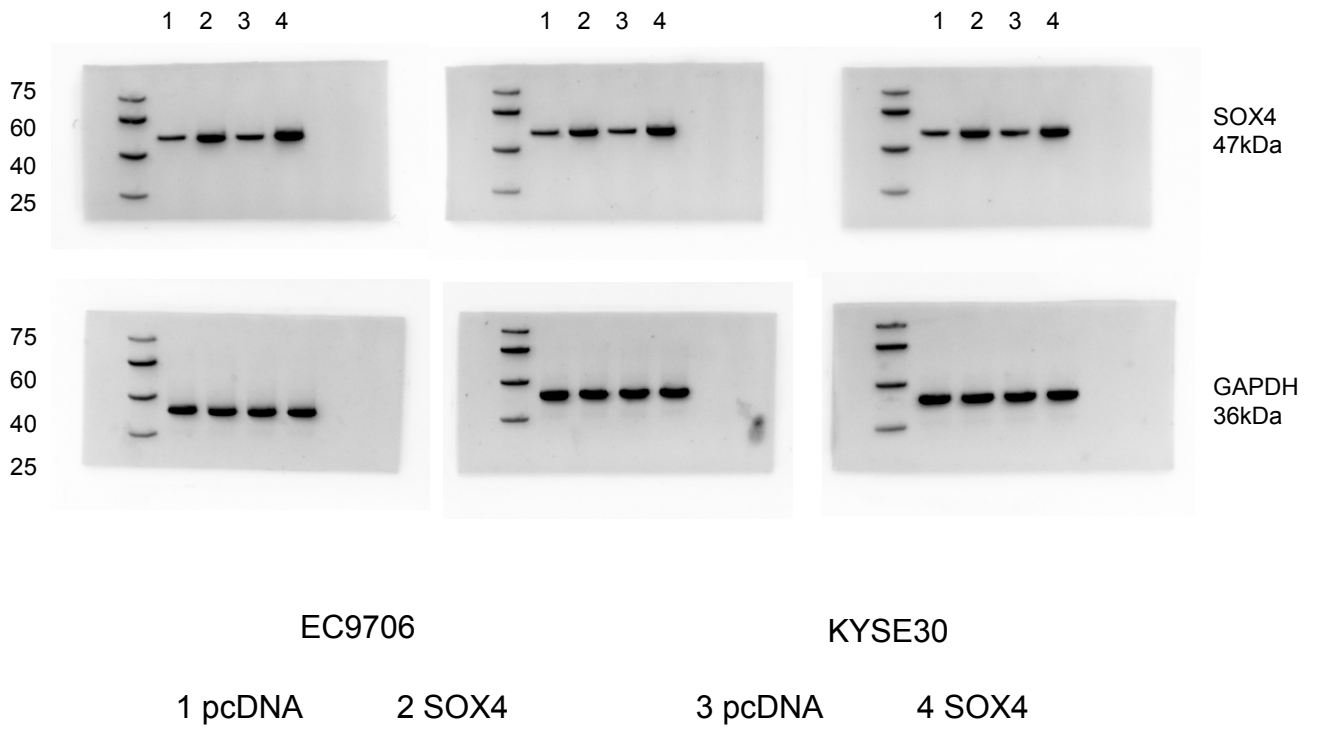

Fig8C

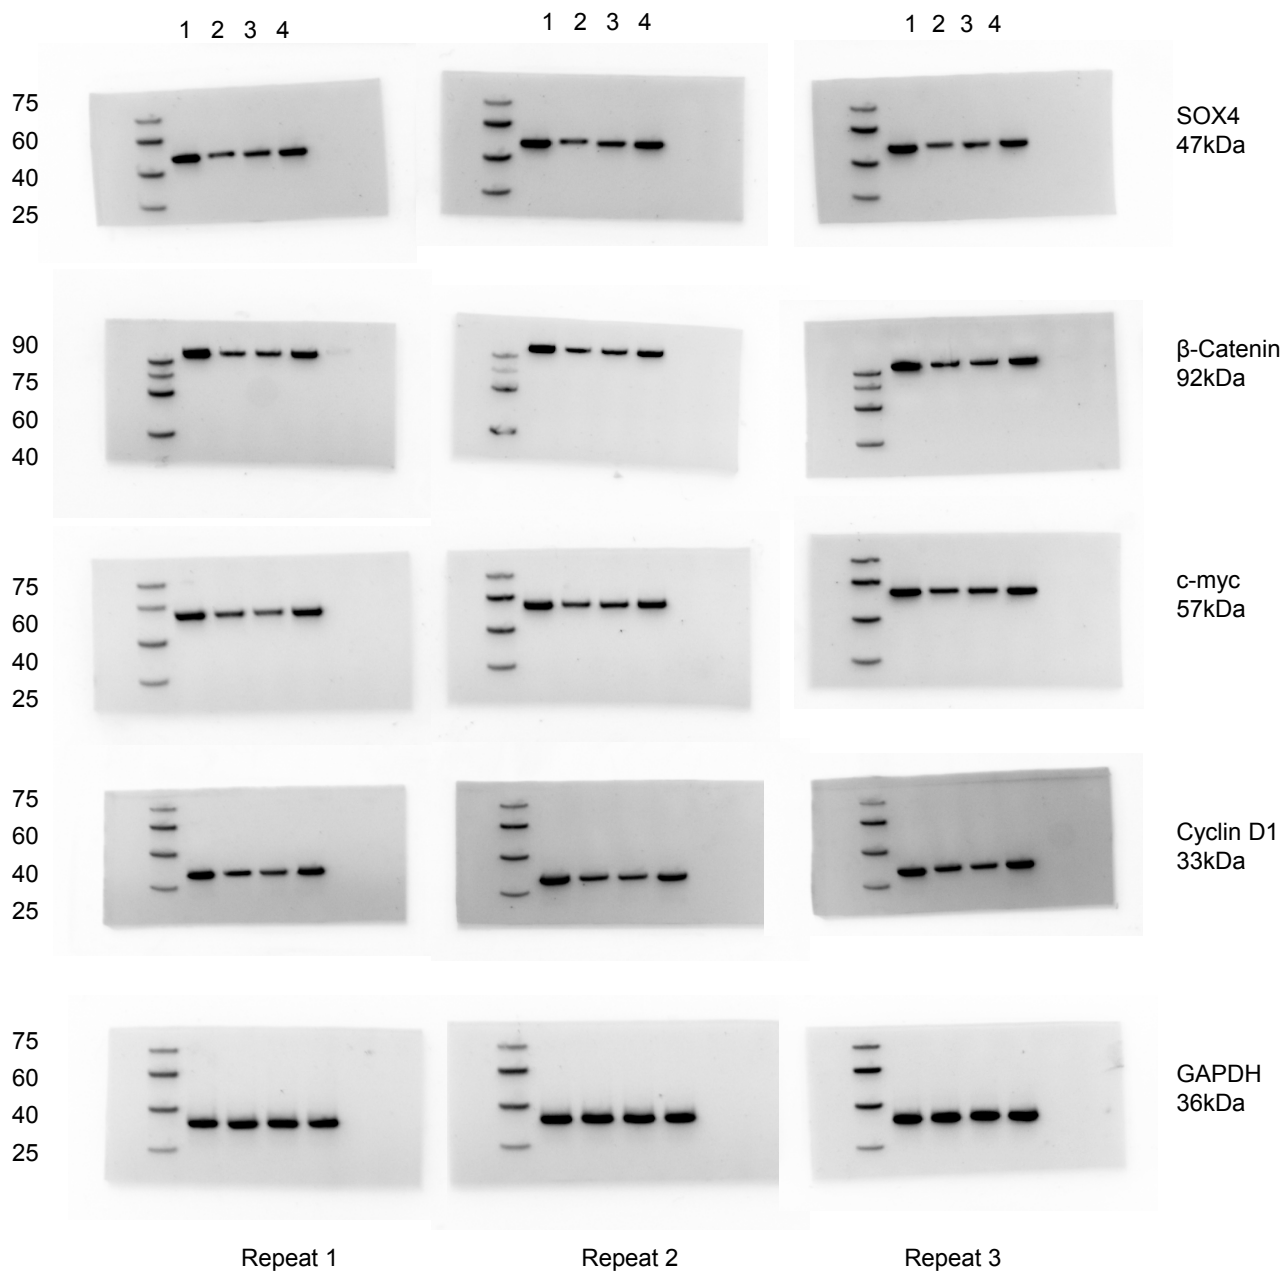

1 sh-NC

2 sh-has\_circ\_0000277 #1

3 sh-has\_circ\_0000277 #1+anti-NC

4 sh-has\_circ\_0000277 #1+anti-miR-873-5p

Fig8D

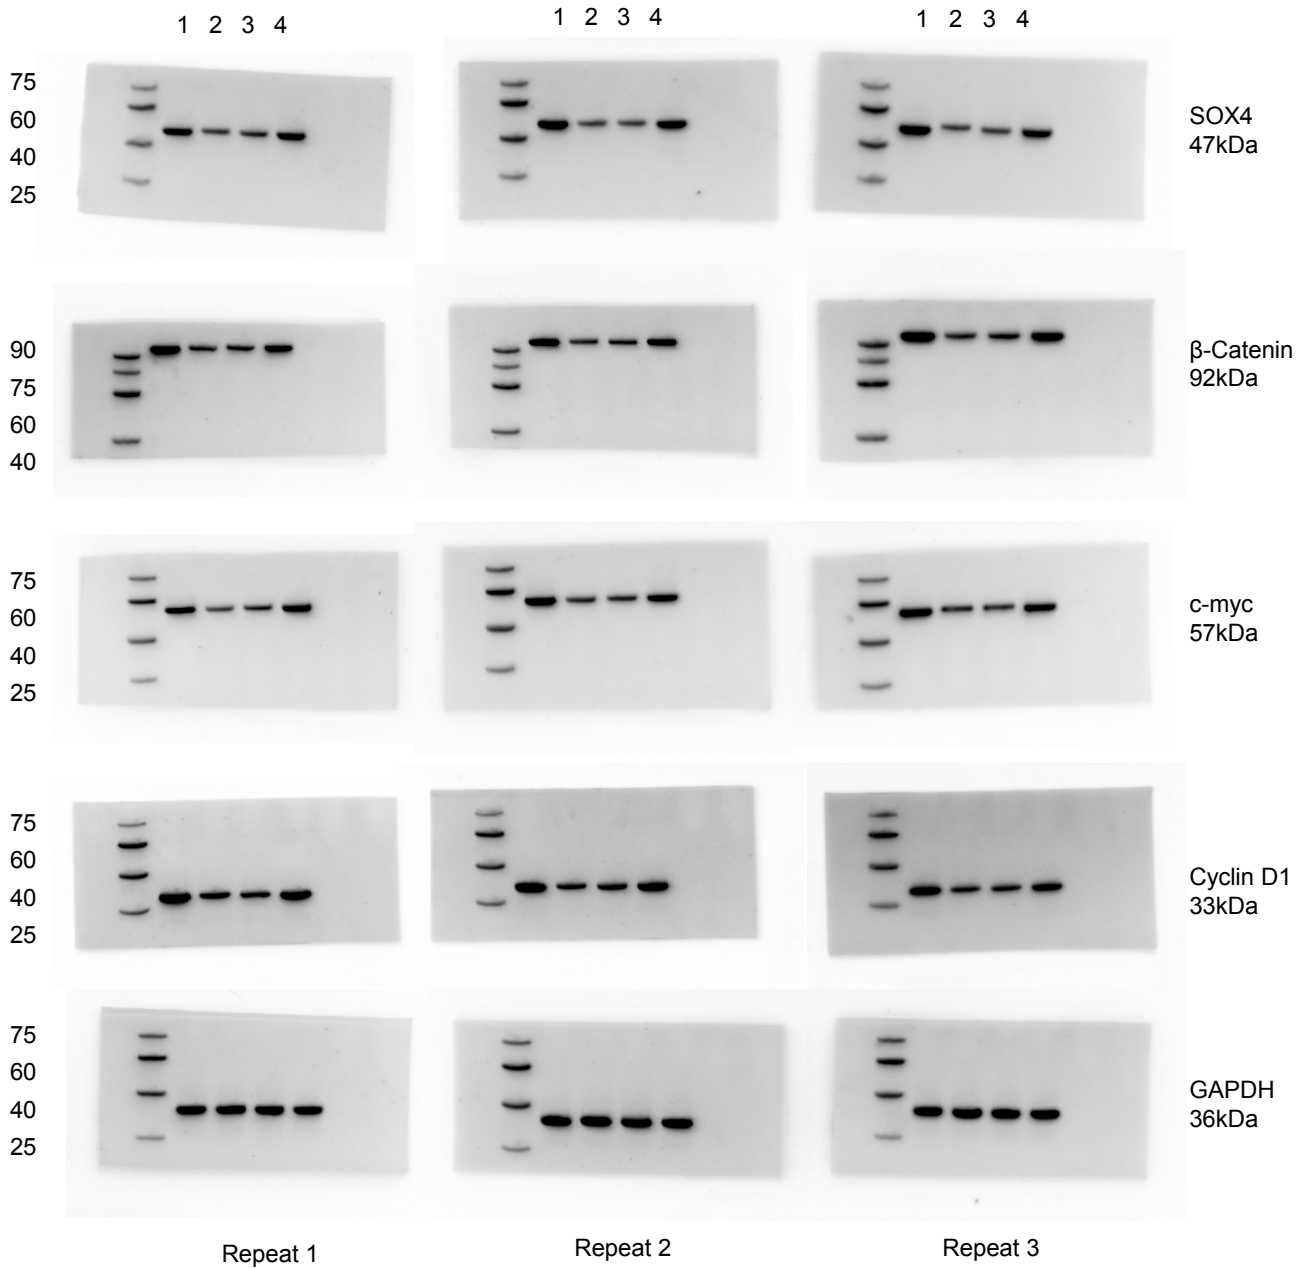

1 sh-NC

2 sh-has\_circ\_0000277 #1

3 sh-has\_circ\_0000277 #1+anti-NC

4 sh-has\_circ\_0000277 #1+anti-miR-873-5p

Fig9E

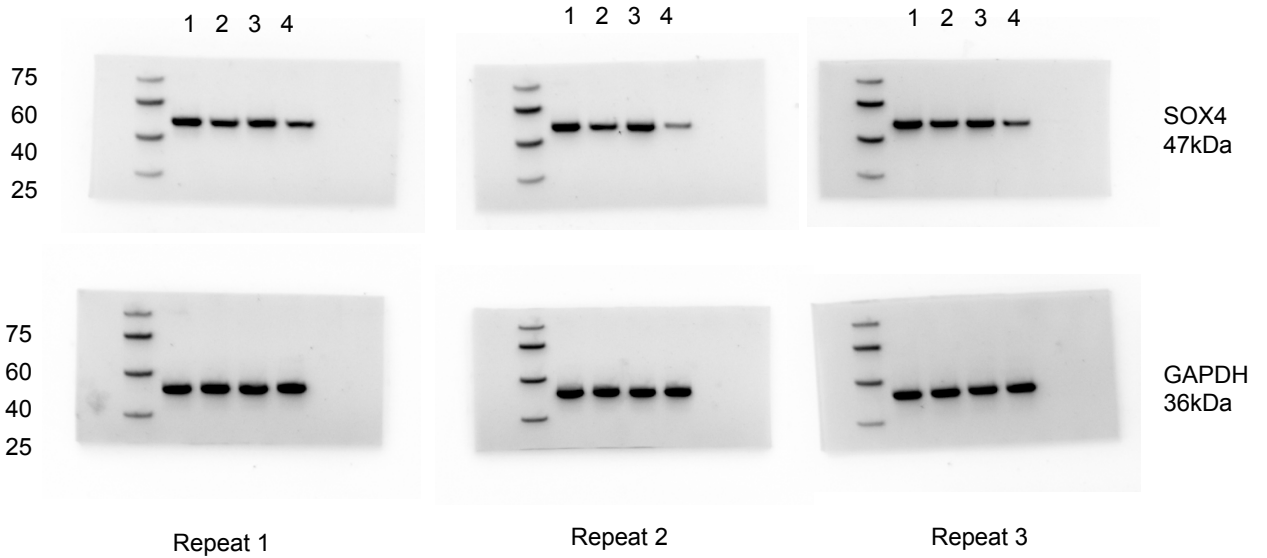

1 sh-NC+PBS

2 sh-has\_circ\_0000277 #1+PBS

3 sh-NC+DDP

4 sh-has\_circ\_0000277 #1+DDP

Supplementary Fig 1A

EC9706

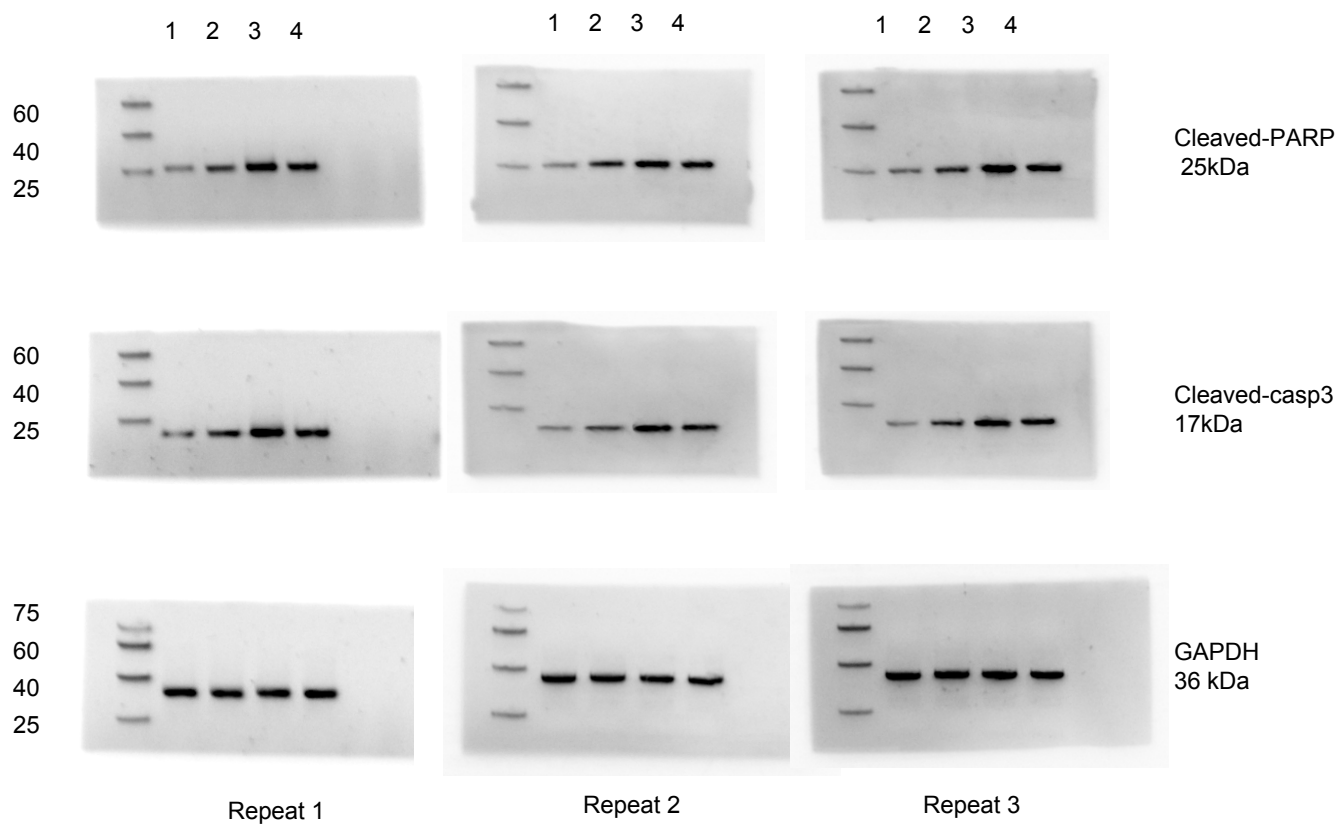

1 sh-NC

3 sh-has\_circ\_0000277 #1+DDP

2 sh-NC+DDP

4 sh-has\_circ\_0000277 #2+DDP

Supplementary Fig 1A

KYSE30

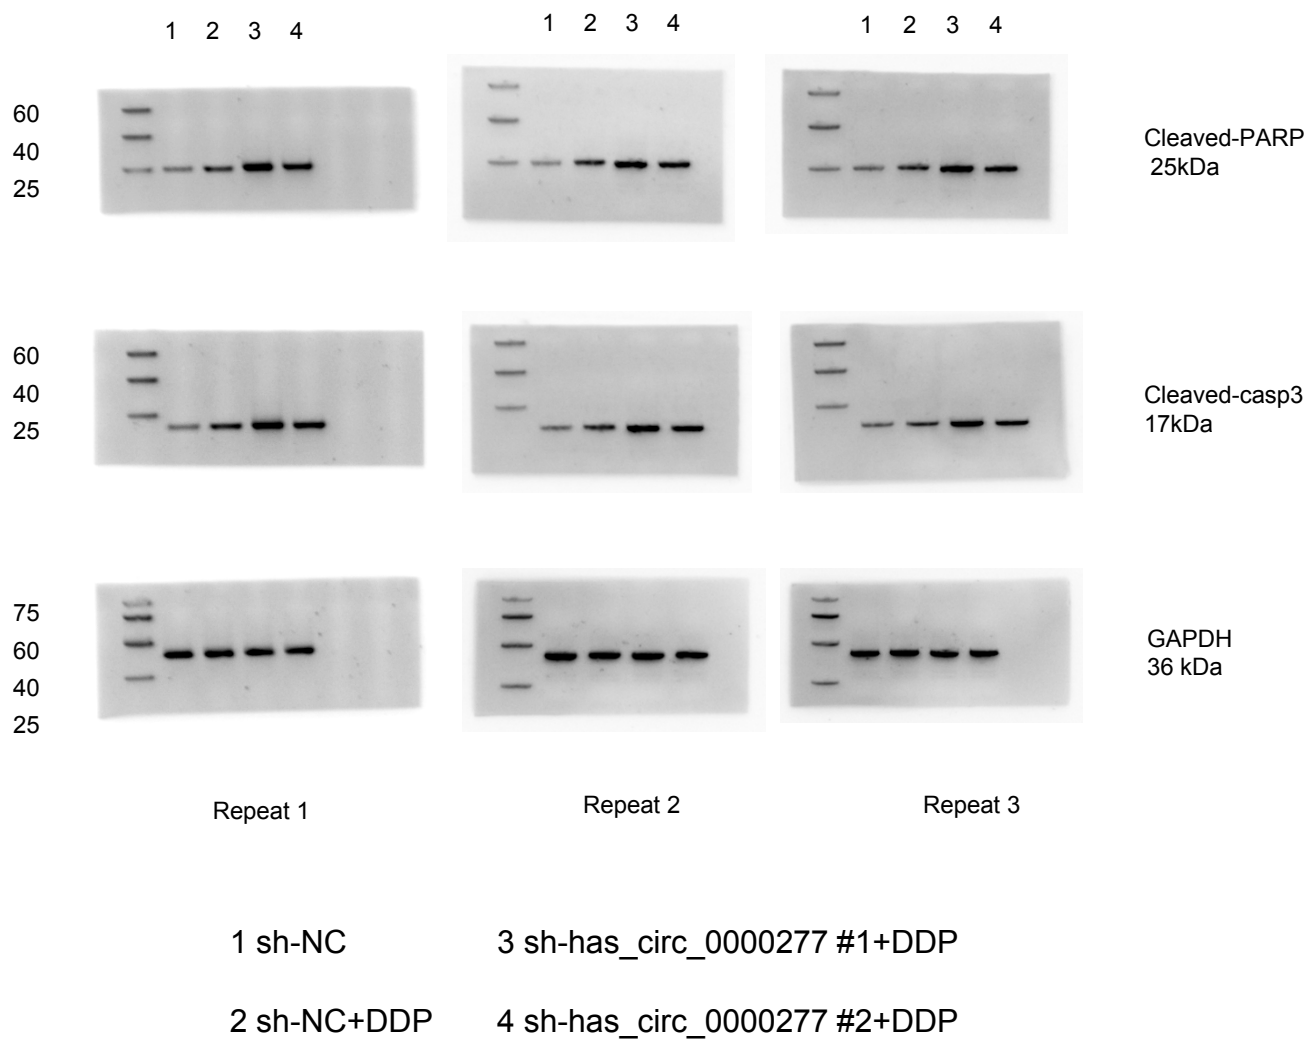



Supplementary Fig 1C

EC9706

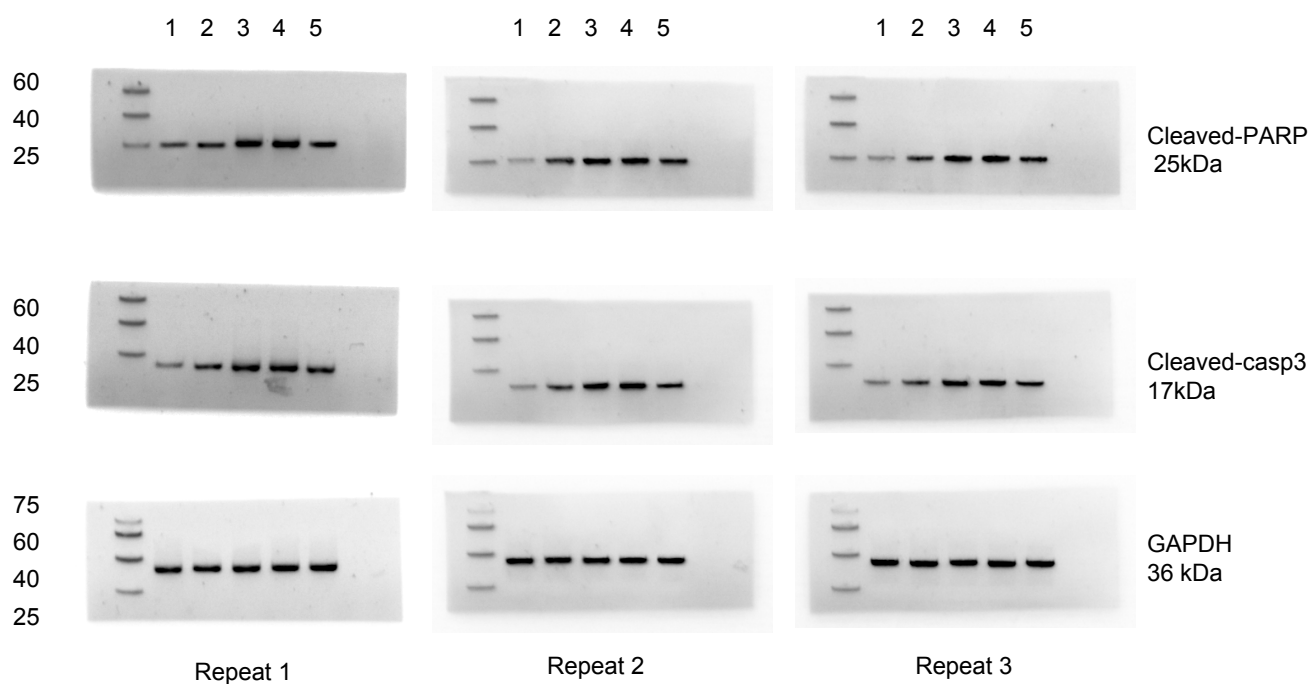

1 sh-NC

2 sh-NC+DDP

3 sh-has\_circ\_0000277 #1+DDP

4 sh-has\_circ\_0000277 #1+anti-NC+DDP

5 sh-has\_circ\_0000277 #1+anti-miR-873-5p+DDP

Supplementary Fig 1C

KYSE30

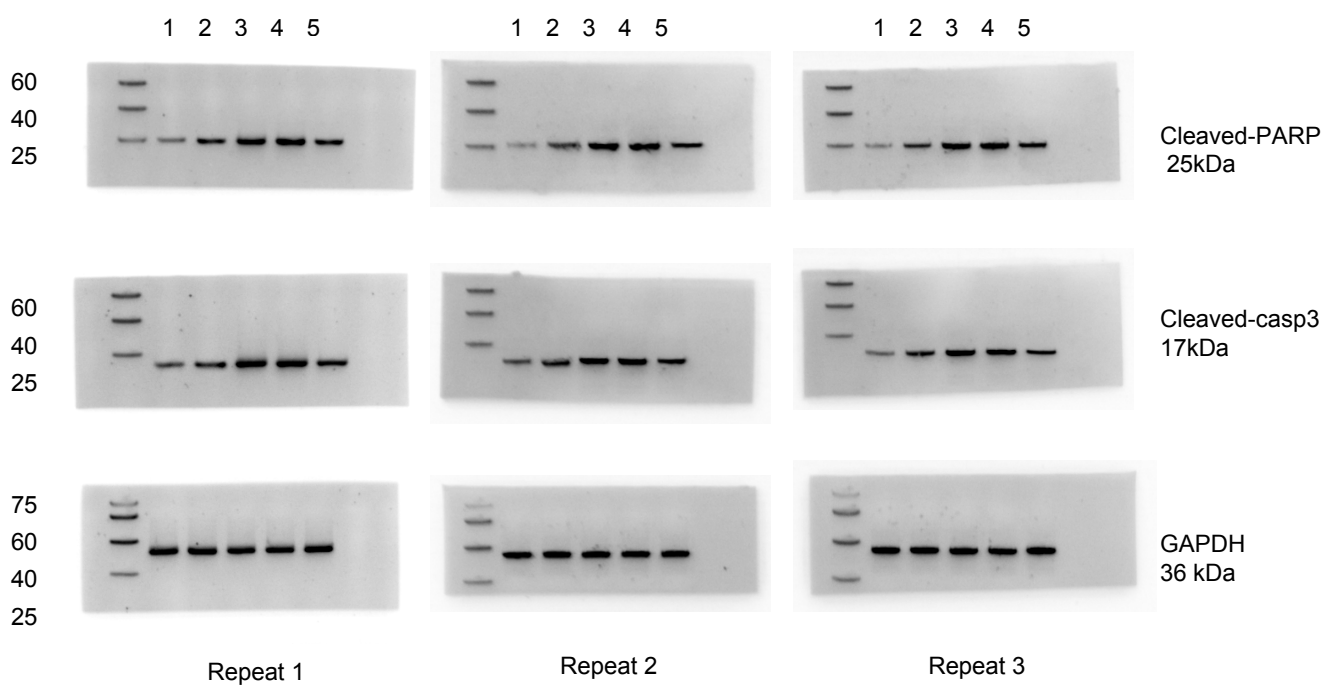

- 1 sh-NC
- 2 sh-NC+DDP
- 3 sh-has\_circ\_0000277 #1+DDP
- 4 sh-has\_circ\_0000277 #1+anti-NC+DDP
- 5 sh-has\_circ\_0000277 #1+anti-miR-873-5p+DDP

Supplementary Fig 1E

EC9706

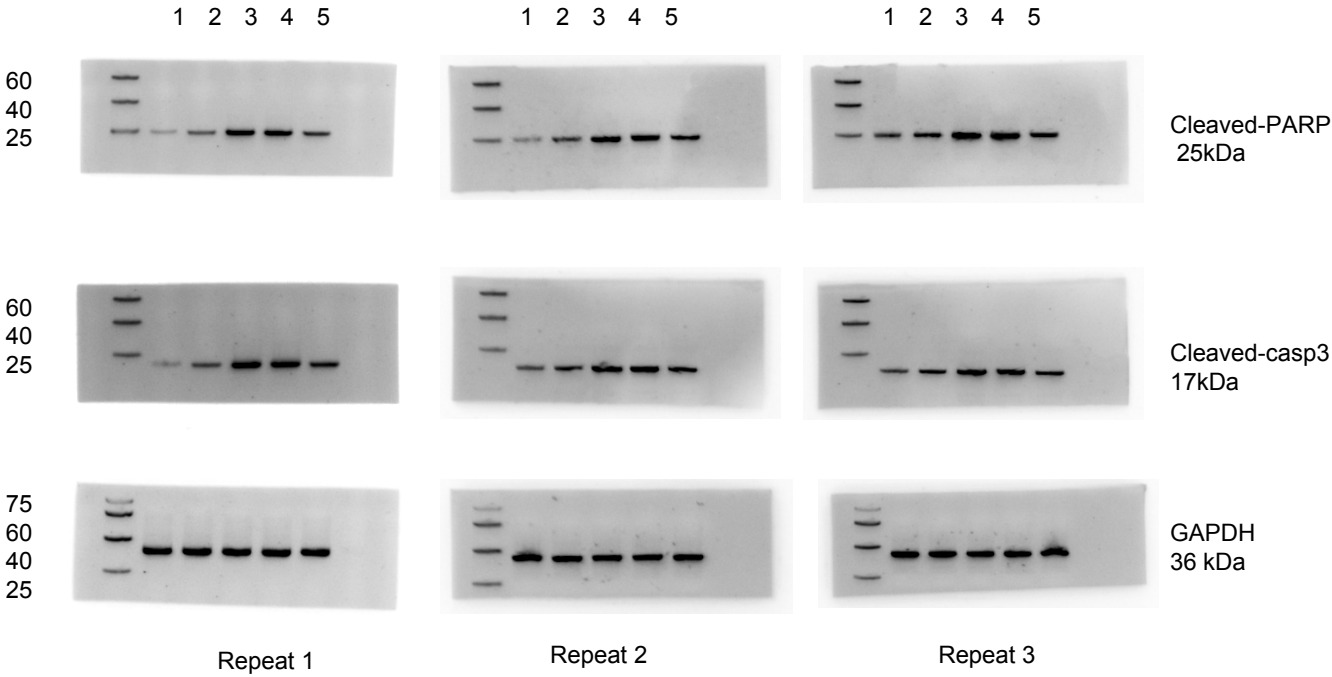

- 1 miR-NC
- 2 miR-NC+DDP
- 3 miR-873-5p+DDP
- 4 miR-873-5p+pcDNA+DDP
- 5 miR-873-5p+SOX4+DDP

Supplementary Fig 1E

KYSE30

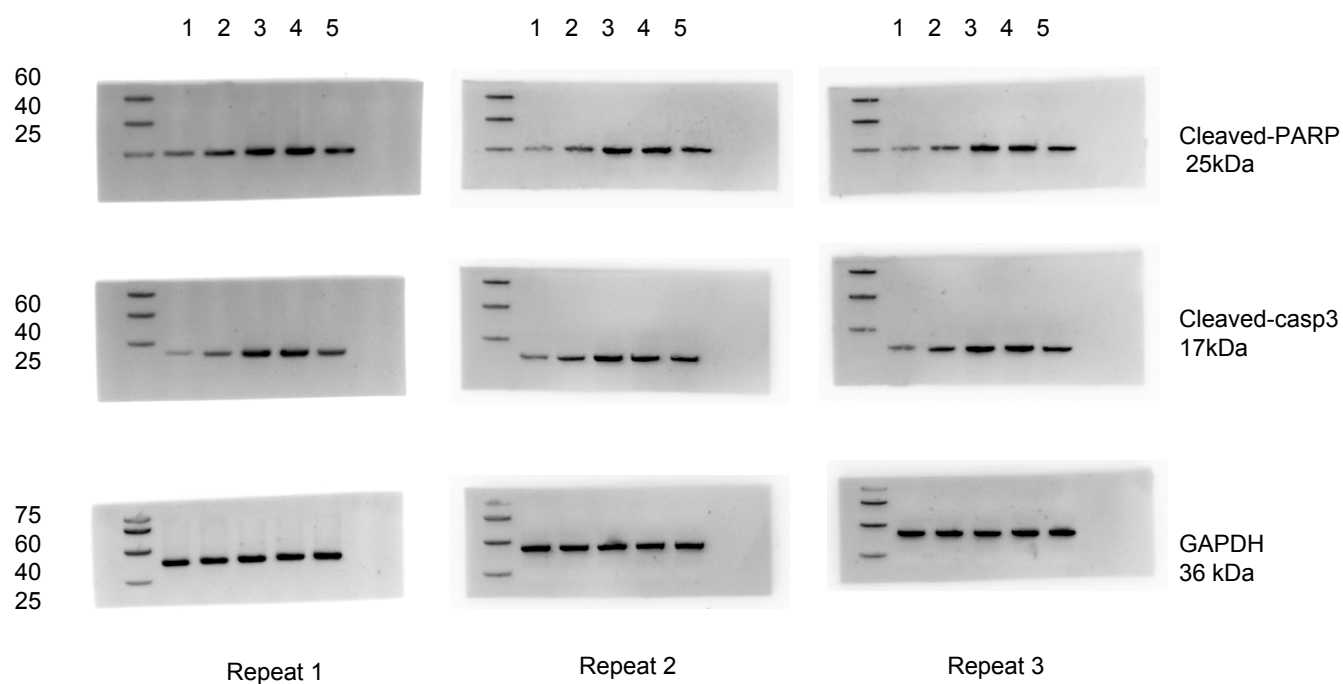

1 miR-NC

2 miR-NC+DDP

3 miR-873-5p+DDP

4 miR-873-5p+pcDNA+DDP

5 miR-873-5p+SOX4+DDP

## Supplementary Fig 1G

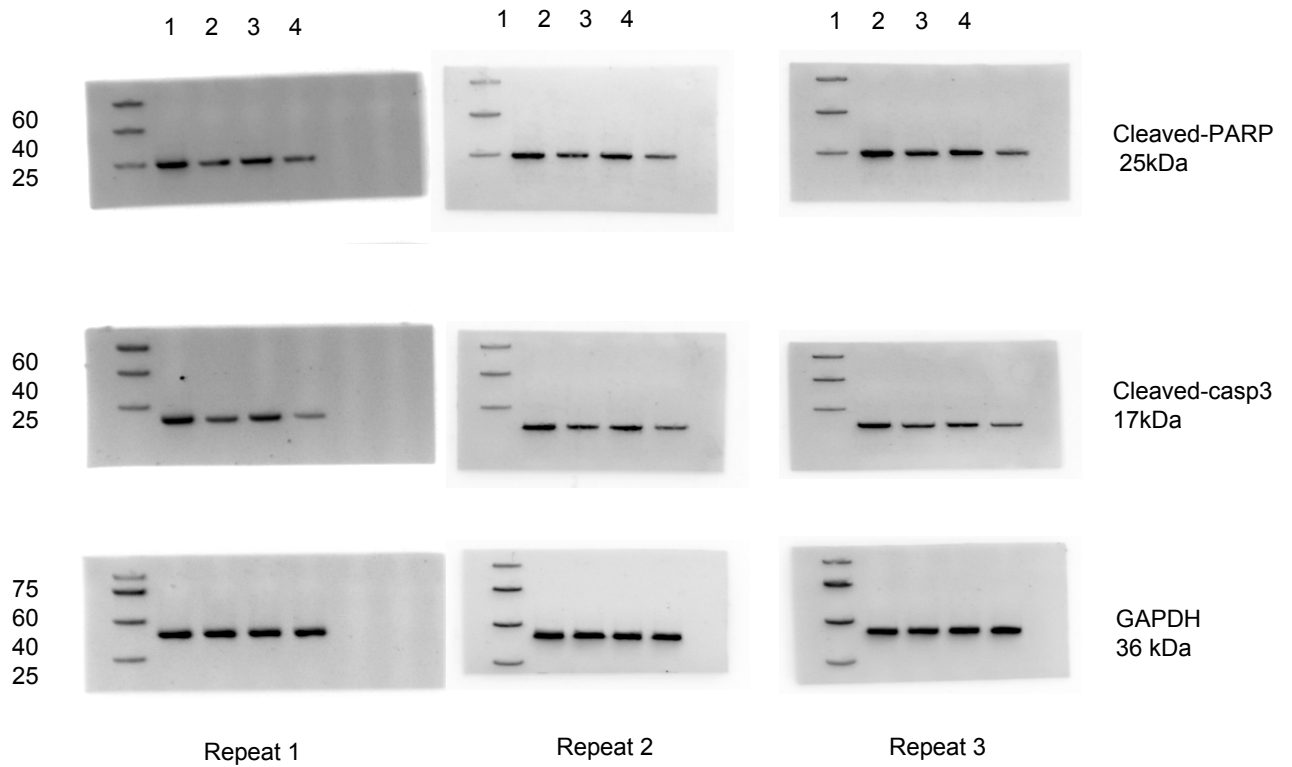

1 sh-NC+PBS

2 sh-has\_circ\_0000277 #1+PBS

3 sh-NC+DDP

4 sh-has\_circ\_0000277 #1+DDP
